# Supplementary material for: Conjugation of multivalent ligands to gold nanoshells and designing a dual modality imaging probe
Source: Royal Society of Chemistry journal article supplement (doi:10.1039/c4tb01811g), 2015-01-01
Supplement: c4tb01811g1.pdf [file c4tb01811g1.pdf]

## Electronic Supplementary Information

# Conjugation of multivalent ligands to gold nanoshells and designing a dual modality imaging probe

Mathieu Bedard, Pramod K. Avti, Tina Lam, Leonie Rouleau, Jean-Claude Tardif, Eric Rhéaume, Frederic Lesage and Ashok Kakkar

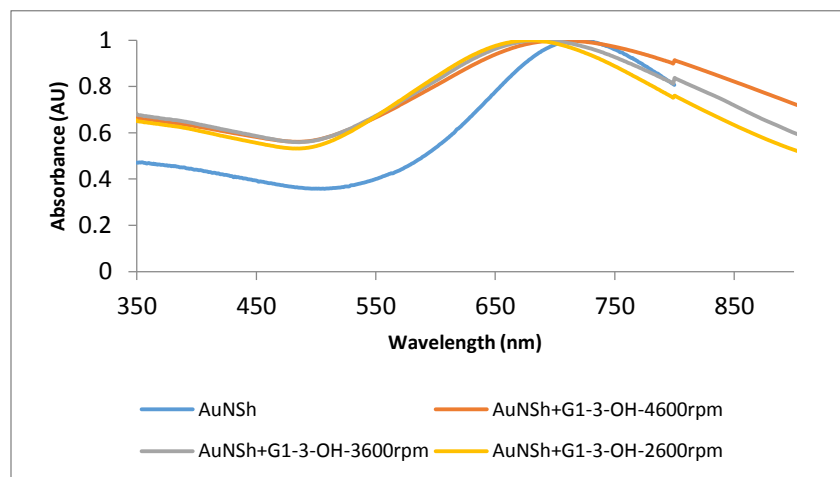

**Figure S1:** UV-Vis absorbance spectra of HAuNSh conjugated with G1-3-TEGOH and centrifuged at three different speeds; 4600 rpm (red), 3600 rpm (green), and 2600 rpm (purple). Note that the bump in the spectra at 800 nm is an artefact of the instrument when there is a change in the light source.

**Table ST1:** Summary of centrifugation speed study carried out on a Thermo Fisher Scientific Sorvall ST40R Centrifuge using an Thermo Scientific Auto-Lock TX-750 Rotor.

| Speed         | Batch       | Absorbance (nm) | Diameter (nm) | Thickness (nm) |
|---------------|-------------|-----------------|---------------|----------------|
|               | AuNSh       | 718             | 30            | 4.3            |
| A<br>4600 rpm | Conjugated  | 707             | 29            | 4.7            |
|               | Supernatant | 496             | 28            | 5.0            |
|               |             | 405             | 13            | -              |
| B<br>3600 rpm | Conjugated  | 688             | 31            | 5.0            |
|               | Supernatant | 499             | 29            | 5.4            |
|               |             | 404             | 14            | -              |
| C<br>2600 rpm | Conjugated  | 679             | 30            | 5.2            |
|               | Supernatant | 497             | 27            | 5.7            |
|               |             | 403             | 15            | -              |

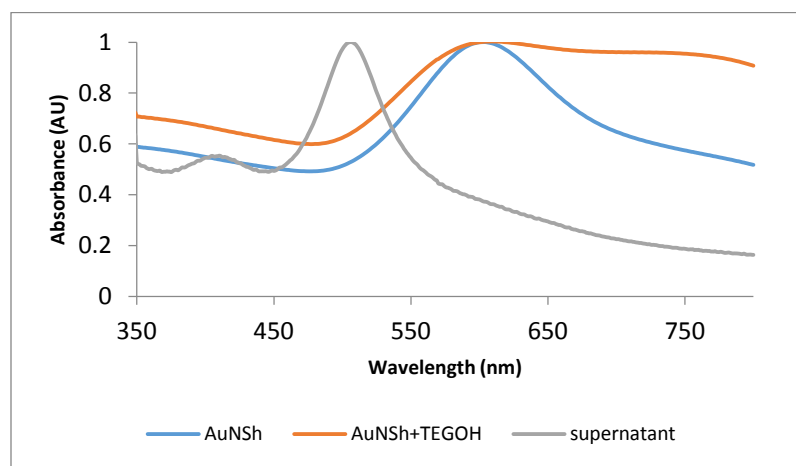

**Figure S2:** UV-Vis absorbance spectra of HAuNSh conjugated with TEGOH.

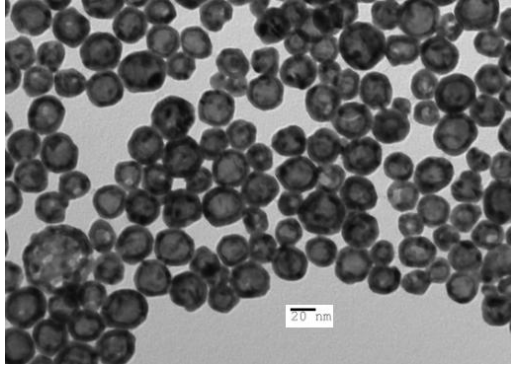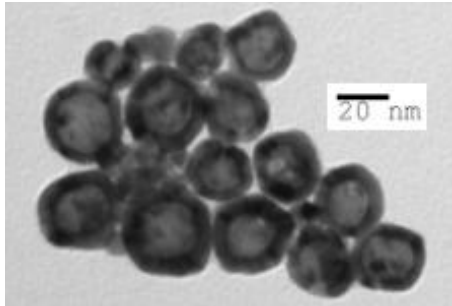

**Figure S3:** TEM images of HAuNSh conjugated with TEGOH.

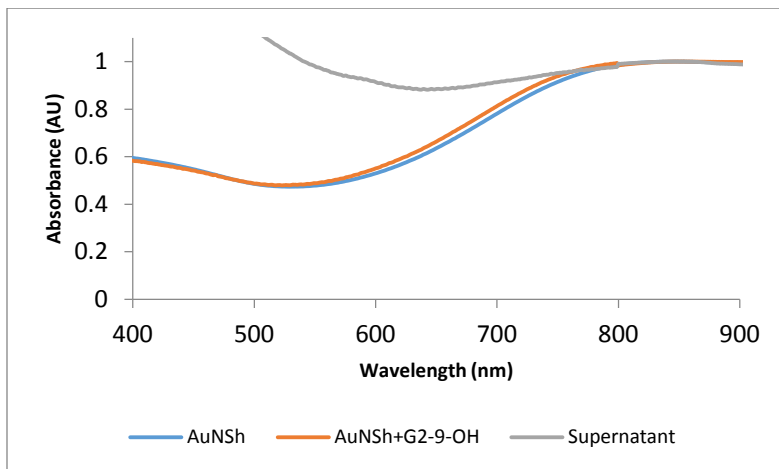

**Figure S4:** UV-Vis absorbance spectra of HAuNSh conjugated with G2-9-TEGOH.

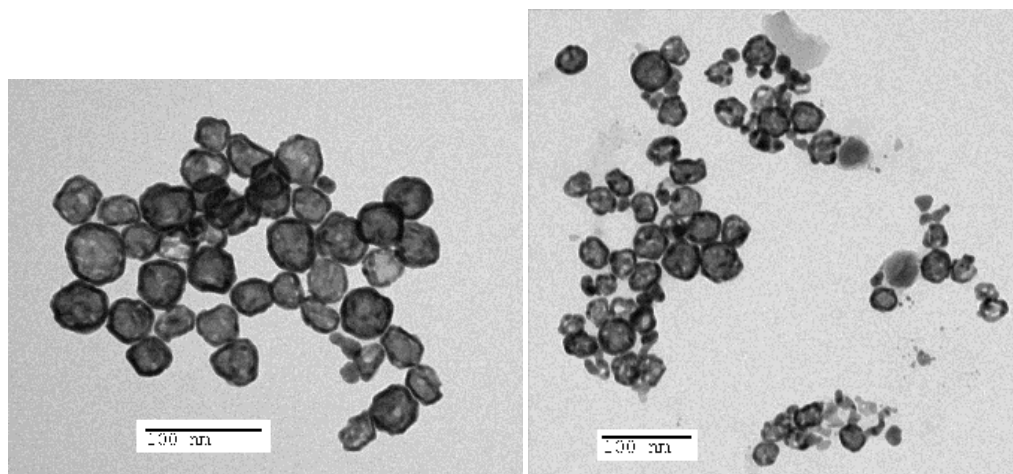

**Figure S5:** TEM image of the supernatant residue of the reaction of AuNSh with G2-9-TEGOH.

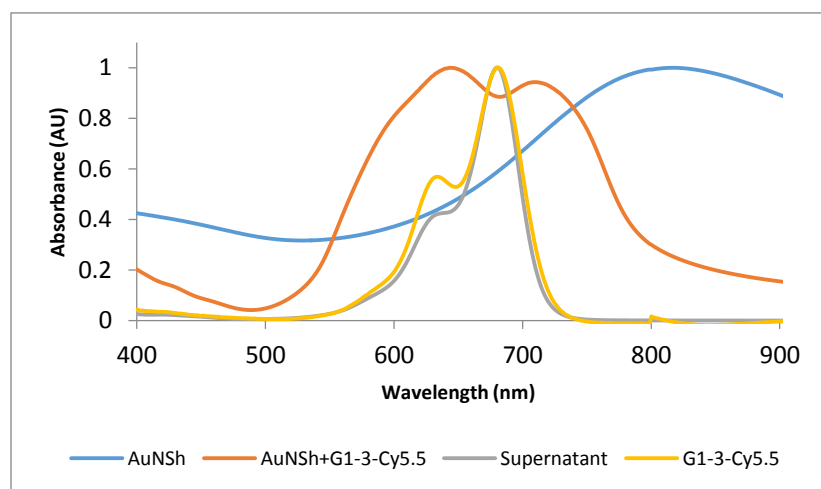

**Figure S6:** UV-Vis absorbance spectra for HAuNSh probes conjugated with G1-3-Cy5.5.

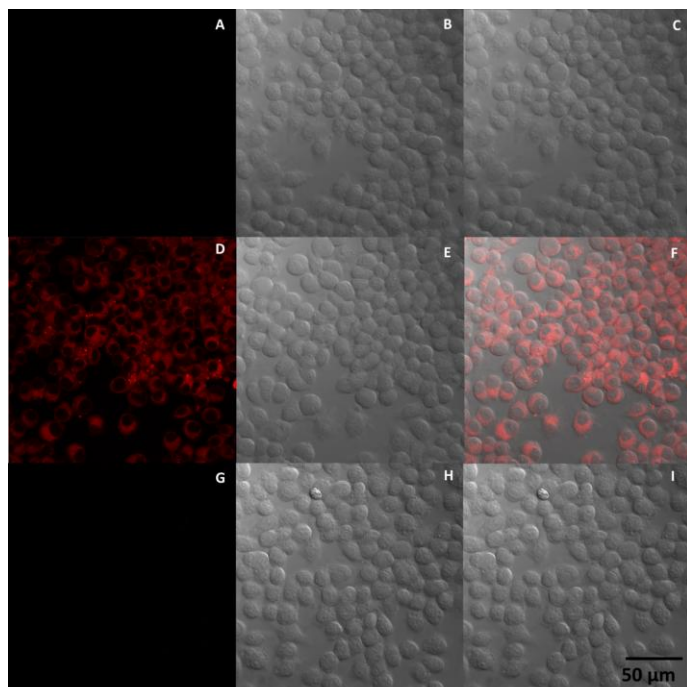

**Figure S7:** Confocal images of unlabeled J774 macrophages (A – C), labeled with G1-3-Cy5.5 ligand (D – F) and G1-3-Cy5.5-HAuNSh (G – I) for 4h. The 3 column panels shows the fluorescence (A,D,G), optical (B,E,H) and overlay of fluorescence and optical (C,F,I) images.
